# Supplementary material for: Dysprosium site occupancy in SrZnO2 nanophosphors probed through XANES
Source: Royal Society of Chemistry journal article supplement (doi:10.1039/d3cp03041e), 2023-01-01
Supplement: d3cp03041e1.pdf [file d3cp03041e1.pdf]

## Dysprosium site occupancy in SrZnO<sub>2</sub> nanophosphors probed through XANES

Manju<sup>a,b</sup>, Parasmani Rajput<sup>c,d,\*</sup>, Ankush Vij<sup>e,#</sup>, and Anup Thakur<sup>a,&</sup>

<sup>a</sup>Advanced Materials Research Lab, Department of Physics, Punjabi University, Patiala-147 002, Punjab, India

<sup>b</sup>Department of Physics, Chandigarh University, Mohali-140 413, Punjab, India

<sup>c</sup>Beamline Development and Application Section, Bhabha Atomic Research Center, Trombay, Mumbai-400 085, Maharashtra, India

<sup>d</sup>Homi Bhabha National Institute, Anushakti Nagar, Mumbai-400 094, India

<sup>e</sup>Department of Physics and Astrophysics, Central University of Haryana, Mahendragarh-123 031, Haryana, India

\*Email: [parasmanim80@gmail.com](mailto:parasmanim80@gmail.com)

#Email: [vij\\_anx@yahoo.com](mailto:vij_anx@yahoo.com)

&Email: [dranupthakur@gmail.com](mailto:dranupthakur@gmail.com)

Table S1: Coordination number ( $N$ ), interatomic distance ( $R$ ), Debye-Waller factor ( $\sigma^2$ ) obtained by EXAFS analysis at the Zn  $K$ -edge, Sr  $K$ -edge and Dy  $L_3$ -edge of the Ce doped SrZnO<sub>2</sub> system. The numbers in parentheses indicate the uncertainty in the last digit.

| Edge           | Sample | Path     | R (Å)     | $\sigma^2$ (Å <sup>2</sup> ) | N       |
|----------------|--------|----------|-----------|------------------------------|---------|
| Zn $K$ -edge   | Dy1    | Zn-O     | 1.947 (5) | 0.0056 (3)                   | 3.3 (1) |
|                |        | Zn-Sr/Dy | 3.133 (3) | 0.0139 (4)                   | 3.0 (3) |
|                |        | Zn-Zn/Dy | 3.185 (2) | 0.0083 (4)                   | 4.2 (2) |
|                | Dy3    | Zn-O     | 1.932 (3) | 0.0063 (2)                   | 3.6 (1) |
|                |        | Zn-Sr/Dy | 3.133 (3) | 0.0129 (2)                   | 3.8 (3) |
|                |        | Zn-Zn/Dy | 3.192 (2) | 0.0086 (2)                   | 4.6 (2) |
|                | Dy5    | Zn-O     | 1.932 (2) | 0.0059 (4)                   | 3.5 (1) |
|                |        | Zn-Sr/Dy | 3.126 (3) | 0.0127 (4)                   | 4.4 (3) |
|                |        | Zn-Zn/Dy | 3.193 (2) | 0.0082 (2)                   | 4.8 (2) |
| Sr $K$ -edge   | Dy1    | Sr-O     | 2.513 (4) | 0.0065 (3)                   | 4.3 (1) |
|                |        | Sr-Zn/Dy | 3.142 (3) | 0.0074 (4)                   | 2.9 (1) |
|                |        | Sr-Sr/Dy | 3.223 (3) | 0.0091 (3)                   | 4.4 (2) |
|                | Dy3    | Sr-O     | 2.521 (2) | 0.0067 (4)                   | 4.5 (1) |
|                |        | Sr-Zn/Dy | 3.142 (2) | 0.0071 (4)                   | 3.2 (1) |
|                |        | Sr-Sr/Dy | 3.232 (1) | 0.0090 (2)                   | 5.1 (2) |
|                | Dy5    | Sr-O     | 2.513 (3) | 0.0069 (2)                   | 4.4 (1) |
|                |        | Sr-Zn/Dy | 3.142 (2) | 0.0071 (2)                   | 3.1 (1) |
|                |        | Sr-Sr/Dy | 3.232 (2) | 0.0089 (4)                   | 5.1 (2) |
| Dy $L_3$ -edge | Dy1    | Dy-O     | 2.323 (2) | 0.0067 (3)                   | 4.0 (1) |
|                |        | Dy-Sr/Dy | 3.475 (2) | 0.0082 (2)                   | 1.0 (2) |
|                |        | Dy-Zn/Dy | 3.158 (3) | 0.0075 (4)                   | 0.4 (2) |
|                | Dy3    | Dy-O     | 2.313 (1) | 0.0064 (3)                   | 4.6 (1) |
|                |        | Dy-Sr/Dy | 3.444 (2) | 0.0073 (4)                   | 3.0 (3) |
|                |        | Dy-Zn/Dy | 3.170 (4) | 0.0069 (4)                   | 0.8 (2) |
|                | Dy5    | Dy-O     | 2.181 (1) | 0.0071 (2)                   | 5.4 (1) |
|                |        | Dy-Sr/Dy | 3.260 (3) | 0.0077 (4)                   | 5.0 (3) |
|                |        | Dy-Zn/Dy | 3.090 (3) | 0.0060 (4)                   | 1.6 (3) |

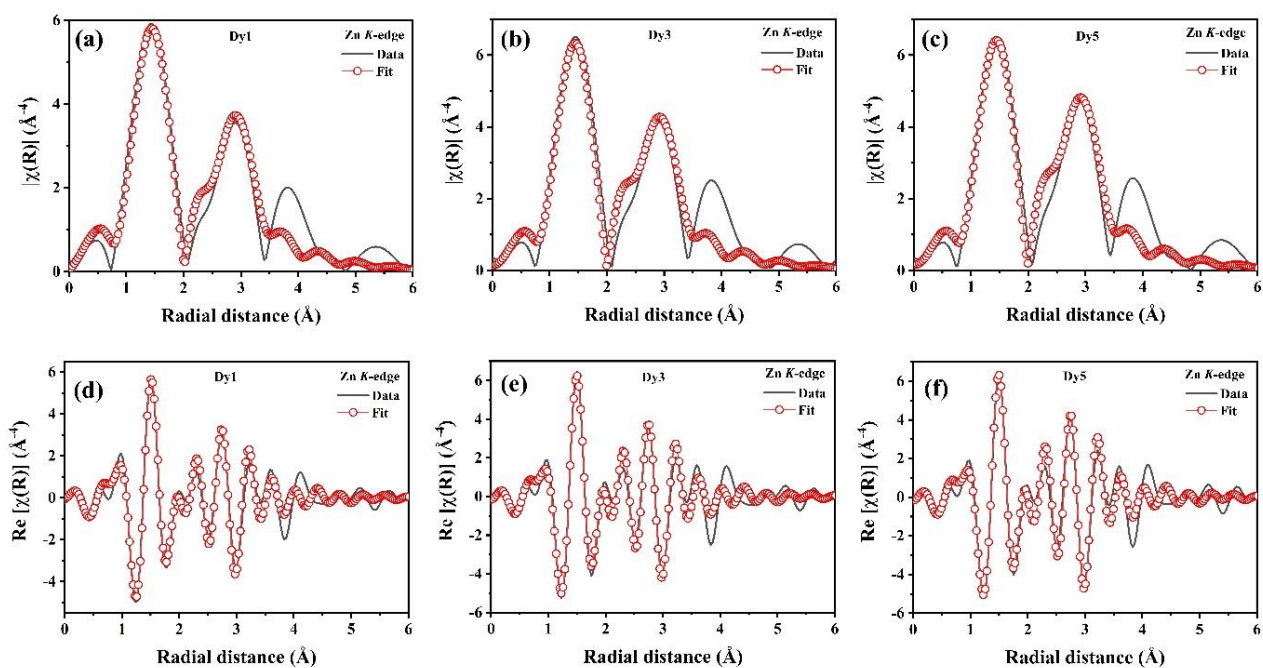

Figure 1: (a,d), (b,e) and (c,f) represent the magnitude and real part of fitted Fourier transformed EXAFS function at Zn *K*-edge of Dy1, Dy3 and Dy5 samples. The curves shown here are phase un-corrected.

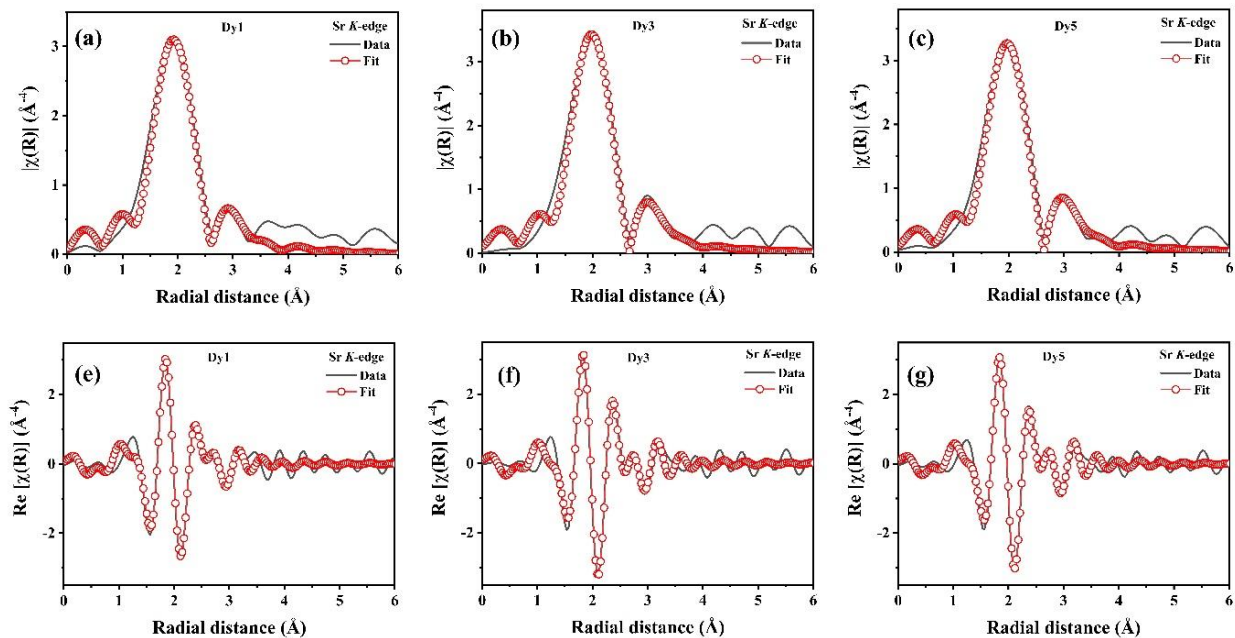

Figure 2: (a,d), (b,e) and (c,f) represent the magnitude and real part of fitted Fourier transformed EXAFS function at Sr *K*-edge of Dy1, Dy3 and Dy5 samples. The curves shown here are phase un-corrected.

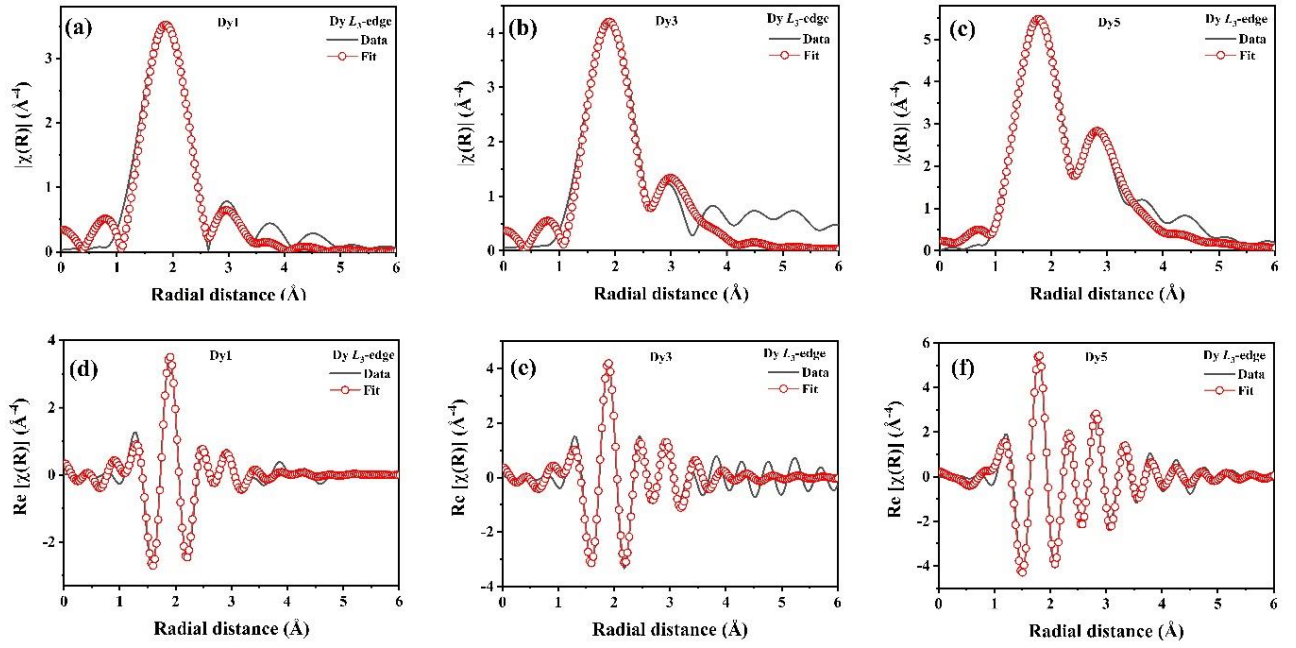

Figure 3: (a,d), (b,e) and (c,f) represent the magnitude and real part of fitted Fourier transformed EXAFS function at Dy  $L_3$ -edge of Dy1, Dy3 and Dy5 samples. The curves shown here are phase un-corrected.
